# Supplementary material for: 3d–4f Metallacrown complexes with a new sandwich core: synthesis, structures and single molecule magnet behavior
Source: Royal Society of Chemistry journal article supplement (doi:10.1039/d0nj00292e), 2020-01-01
Supplement: d0nj00292e1.pdf [file d0nj00292e1.pdf]

## Supporting Information

### **3d-4f metallocrown complexes with new sandwich core: synthesis, structures and single molecule magnet behavior**

Wen-Wen Chang, Hua Yang, Hai-Quan Tian, Da-Cheng Li\* and Jian-Min Dou

#### **Table of contents**

|                                    |  |
|------------------------------------|--|
| 1: Crystal Data and Structure..... |  |
| 2: Magnetic Measurements.....      |  |

## 1: Crystal Data and Structure.

**Table S1.** Crystal data and structure refinement for **1-2**

| complex                           | <b>1</b>                                                                                           | <b>2</b>                                                                                            |
|-----------------------------------|----------------------------------------------------------------------------------------------------|-----------------------------------------------------------------------------------------------------|
| Chemical formula                  | C <sub>33</sub> H <sub>120</sub> Cl <sub>3</sub> Cu <sub>8</sub> ErN <sub>16</sub> O <sub>43</sub> | C <sub>33</sub> H <sub>120</sub> Cl <sub>3</sub> Cu <sub>8</sub> N <sub>16</sub> O <sub>43</sub> Yb |
| CCDC number                       | 2009454                                                                                            | 2009455                                                                                             |
| M, g mol <sup>-1</sup>            | 2211.37                                                                                            | 2217.15                                                                                             |
| Crystal system                    | monoclinic                                                                                         | monoclinic                                                                                          |
| a /Å                              | 11.3758(8)                                                                                         | 11.3776(3)                                                                                          |
| b/Å                               | 20.6667(11)                                                                                        | 20.6630(6)                                                                                          |
| c/Å                               | 18.5033(10)                                                                                        | 18.5000(5)                                                                                          |
| 2Unit cell volume/Å <sup>3</sup>  | 4330.8(4)                                                                                          | 4328.1(2)                                                                                           |
| Temperature/K                     | 132(4)                                                                                             | 130(11)                                                                                             |
| Space group                       | <i>P</i> 2(1)                                                                                      | <i>P</i> 2(1)                                                                                       |
| <i>Z</i>                          | 2                                                                                                  | 2                                                                                                   |
| R <sub>int</sub>                  | 0.0564                                                                                             | 0.0686                                                                                              |
| R1 a ( <i>I</i> > 2σ( <i>I</i> )) | 0.1126                                                                                             | 0.1161                                                                                              |
| wR2 b (all data)                  | 0.3464                                                                                             | 0.3049                                                                                              |

**Table S2.** Selected bond lengths (Å) and angles (deg) for complex **1**.

|         |           |            |          |
|---------|-----------|------------|----------|
| Er1-O1  | 2.30(2)   | O1-Er1-O3  | 68.9(7)  |
| Er1-O3  | 2.342(18) | O1-Er1-O5  | 107.5(7) |
| Er1-O5  | 2.36(2)   | O1-Er1-O7  | 68.6(7)  |
| Er1-O7  | 2.283(17) | O1-Er1-O9  | 87.0(7)  |
| Er1-O9  | 2.315(19) | O1-Er1-O11 | 82.5(7)  |
| Er1-O11 | 2.308(19) | O1-Er1-O13 | 140.8(7) |
| Er1-O13 | 2.316(18) | O1-Er1-O15 | 146.9(7) |
| Er1-O15 | 2.312(19) | O3-Er1-O5  | 69.4(6)  |
| Cu1-O2  | 1.910(19) | O3-Er1-O7  | 106.4(6) |
| Cu1-N3  | 1.96(2)   | O3-Er1-O9  | 82.4(6)  |
| Cu1-N4  | 2.01(2)   | O1-Cu1-O2  | 82.1(8)  |
| Cu2-O3  | 1.895(19) | O1-Cu1-O3  | 63.1(7)  |
| Cu2-O4  | 1.982(19) | O1-Cu1-N3  | 89.5(9)  |
| Cu2-N5  | 1.96(2)   | O1-Cu1-N4  | 171.8(9) |
| Cu2-N6  | 2.01(2)   | O2-Cu1-O3  | 144.7(7) |
| Cu3-O5  | 1.871(18) | O2-Cu1-N3  | 170.7(9) |
| Cu3-O6  | 1.98(2)   | O2-Cu1-N4  | 94.7(9)  |
| Cu3-N7  | 1.92(2)   | O3-Cu1-N3  | 26.5(8)  |
| Cu3-N8  | 2.04(2)   | O3-Cu1-N4  | 120.6(8) |

**Table S3.** Selected bond lengths (Å) and angles (deg) for complex **2**.

|        |           |           |          |
|--------|-----------|-----------|----------|
| Yb1-O1 | 2.310(16) | O1-Yb1-O3 | 69.7(5)  |
| Yb1-O3 | 2.328(14) | O1-Yb1-O5 | 108.2(5) |
| Yb1-O7 | 2.293(13) | O1-Yb1-O7 | 70.1(5)  |
| Yb1-O9 | 2.313(13) | O1-Yb1-O9 | 85.0(5)  |

|             |           |            |          |
|-------------|-----------|------------|----------|
| Yb1-O11     | 2.256(15) | O1-Yb1-O11 | 81.5(5)  |
| Yb1-O13     | 2.315(14) | O1-Yb1-O13 | 141.9(5) |
| Yb1-O15     | 2.319(14) | O1-Yb1-O15 | 146.3(5) |
| Cu1-O2      | 1.932(16) | O3-Yb1-O5  | 69.7(5)  |
| Cu1-N3      | 1.927(18) | O3-Yb1-O7  | 107.3(5) |
| Cu1-N4      | 1.99(2)   | O3-Yb1-O9  | 81.5(5)  |
| Cu4-N1      | 1.932(17) | O3-Yb1-O11 | 140.8(5) |
| Cu4-N2      | 1.981(19) | O3-Yb1-O13 | 146.1(5) |
| Cu5-O9      | 1.895(15) | O1-Cu1-O2  | 81.1(7)  |
| Cu5-O10     | 1.955(14) | O1-Cu1-O3  | 64.3(6)  |
| Cu5-N11     | 1.955(15) | O1-Cu1-N3  | 90.7(7)  |
| Cu5-N12     | 1.97(2)   | O1-Cu1-N4  | 172.4(8) |
| Cu6-O11     | 1.921(15) | O2-Cu1-O3  | 144.9(5) |
| Cu6-N13     | 1.914(17) | O2-Cu1-N3  | 170.9(7) |
| O13-Yb1-O15 | 69.4(5)   | O2-Cu1-N4  | 95.3(8)  |

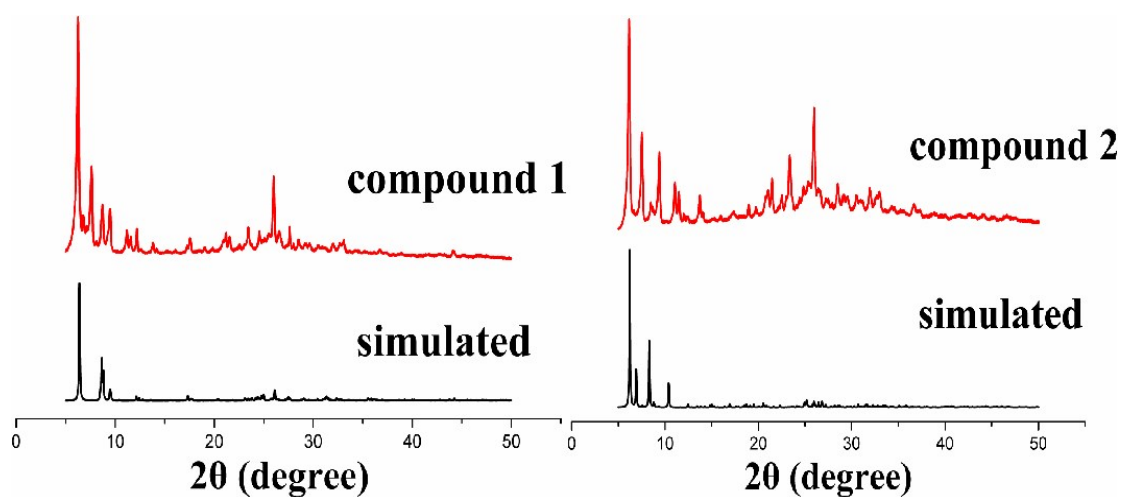

**Figure S1.** Powder XRD comparison for complexes 1-2 against that calculated from crystal data

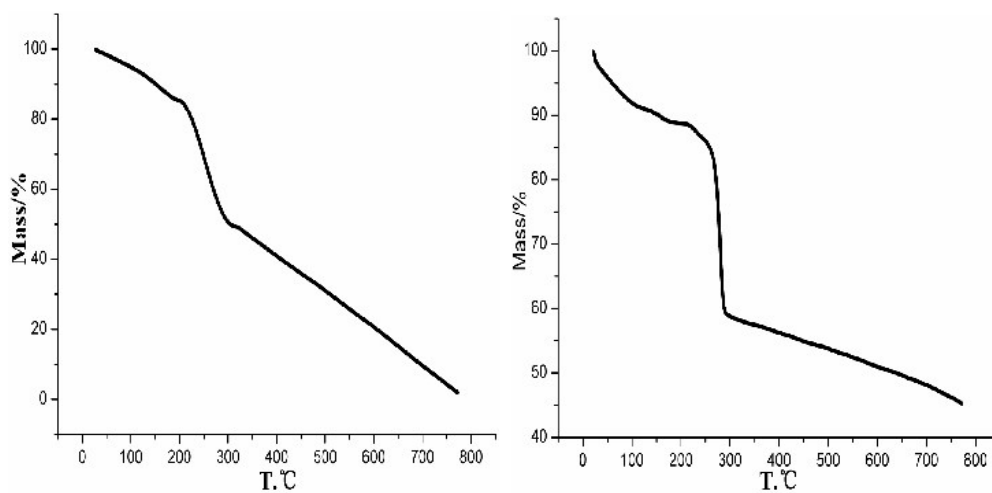

**Figure S2.** Thermogravimetric analysis of complexes 1-2 (from Left to right)

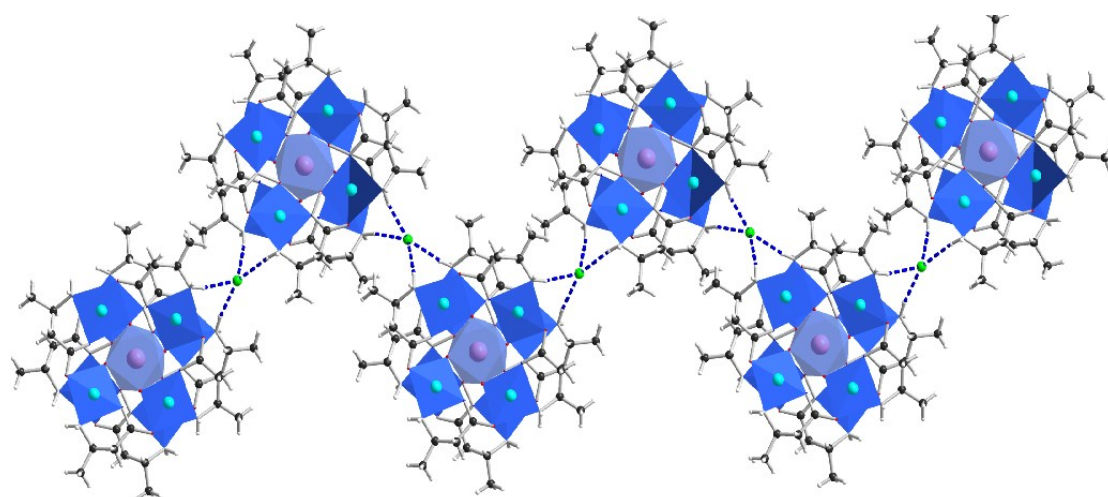

**Figure. S3.** The 1D chain established by cross-coordinated MC units for **1**.

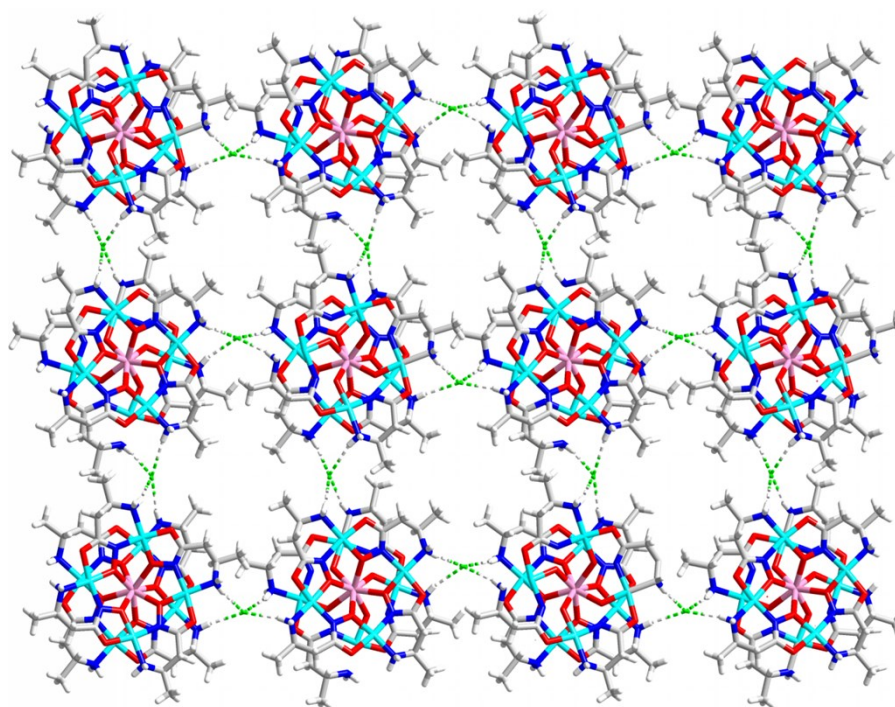

**Figure. S4.** The 2D network established by cross-coordinated MC units for **1**.

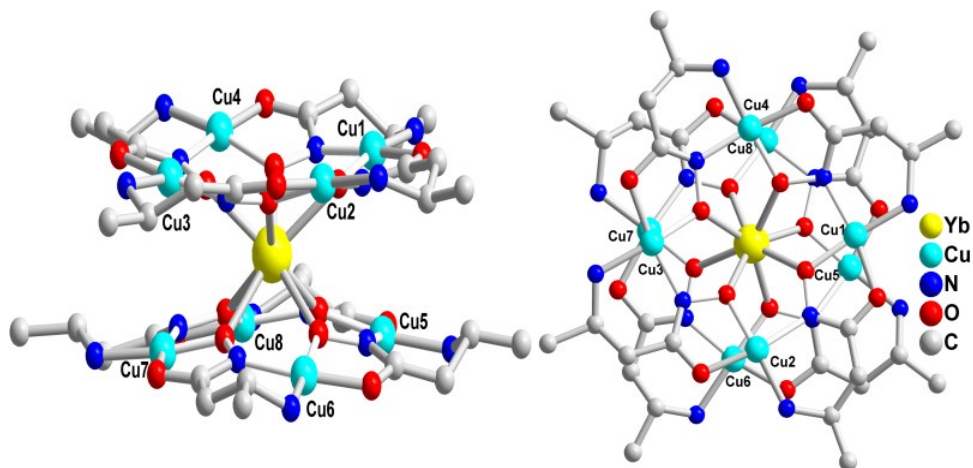

Figure. S5. The structure of complex **2** with hydrogen atoms omitted for clarity

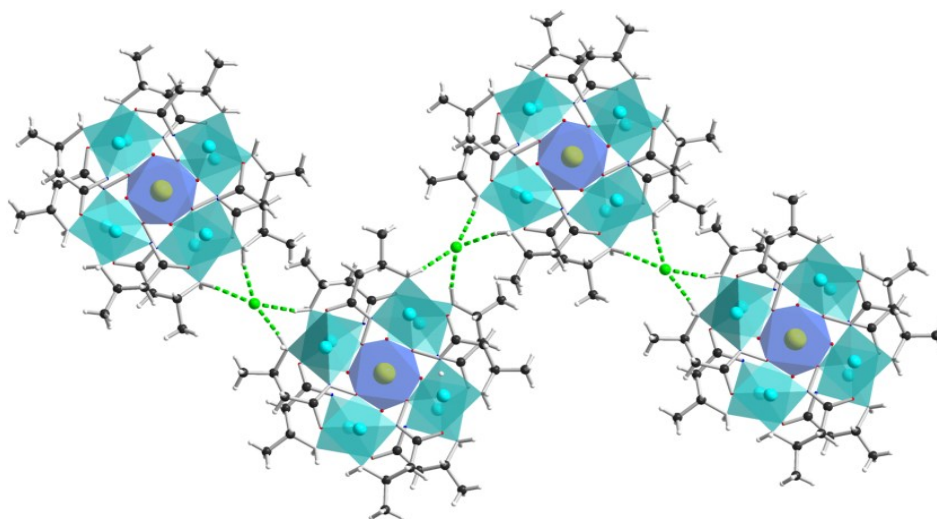

Figure. S6. The 1D network established by cross-coordinated MC units for **2** with extra hydrogen atoms omitted for clarity

## 2: Magnetic Measurements.

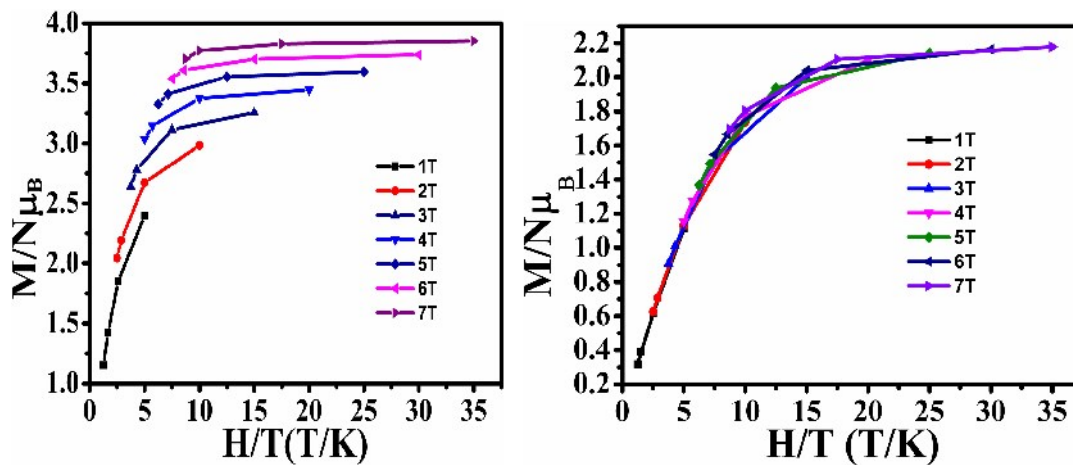

Figure. S7. The plots of reduced magnetization  $M/N\mu_B$  vs  $H/T$  at the indicated applied fields for

complexes 1-2 (from Left to right)

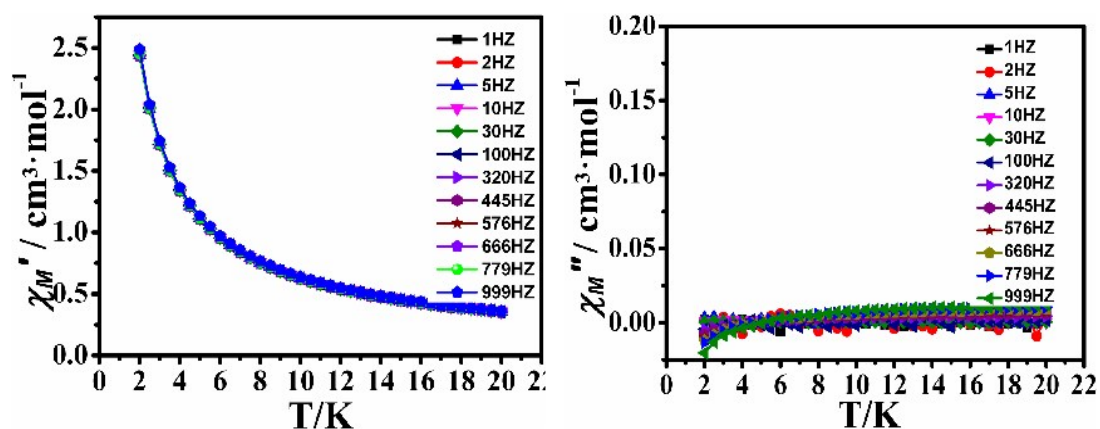

Figure. S8. Temperature-dependent ac susceptibilities under an applied dc field of 0 Oe for

complex 1

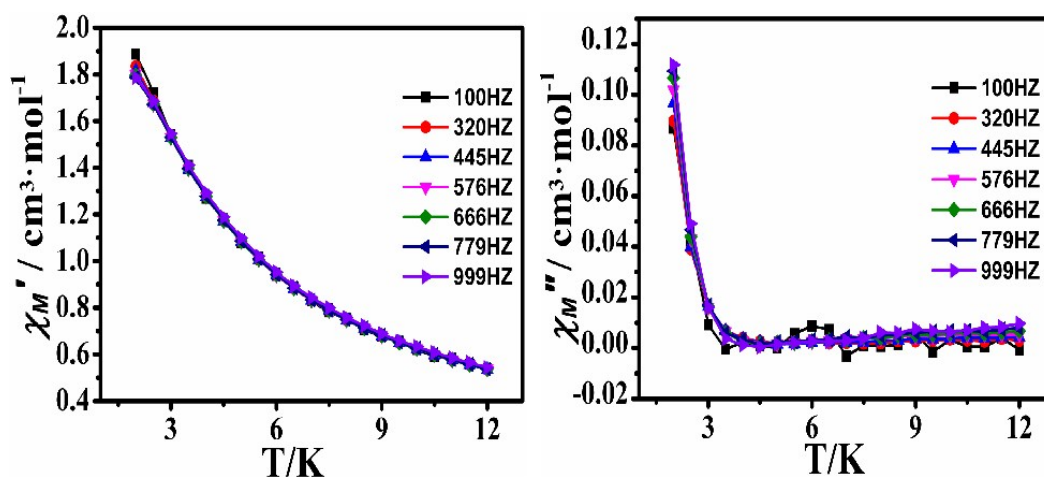

Figure. S9. Temperature-dependent ac susceptibilities under an applied dc field of 1000 Oe for

complex

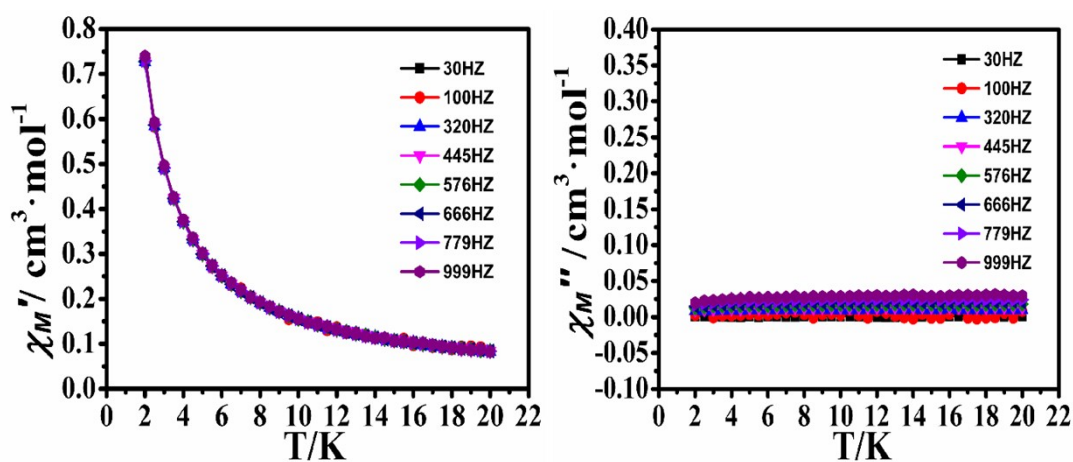

Figure. S10. Temperature-dependent ac susceptibilities under an applied dc field of 0 Oe for

complex 2

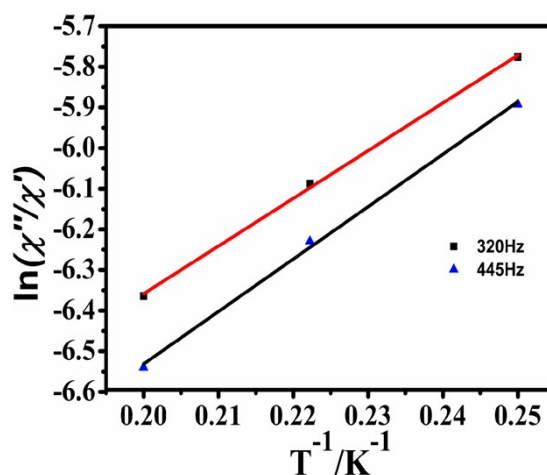

Figure. S11. Plots of  $\ln(\chi''/\chi')$  vs.  $1/T$  for complex 1

Table S4. The energy barrier ( $\Delta E_{\text{eff}}$ ) and relaxation time ( $\tau_0$ ) calculated through Debye equation:

$$\ln(\chi''/\chi') = \ln(\omega\tau_0) + \Delta E_{\text{eff}}/k_B T.$$

|        | $\Delta E_{\text{eff}}$ | $\tau_0$                |
|--------|-------------------------|-------------------------|
| 320Hz  | 8.16 K                  | $8.21 \times 10^{-8}$ s |
| 445 Hz | 8.97 K                  | $3.97 \times 10^{-8}$ s |

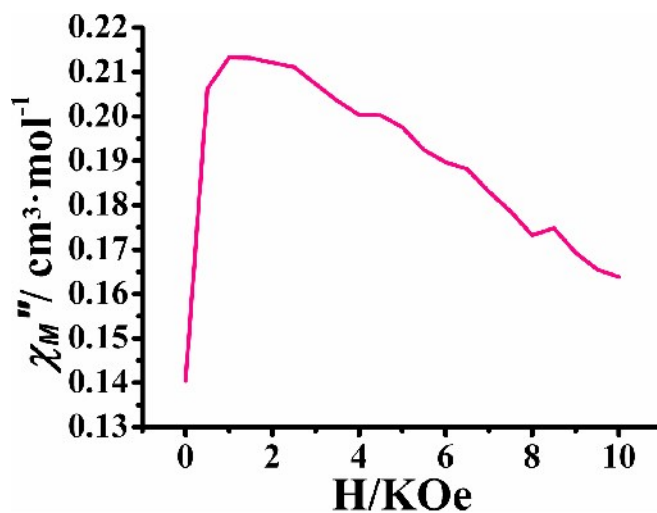

Figure S12. Ac-scan field data of (2) at 999 Hz and 2.0 K

Table S5. Relaxation distribution and times fitted from Cole-Cole data for 2.

| T(K) | $\alpha$ | $\tau$ (s)   |
|------|----------|--------------|
| 2.0  | 0.1795   | 0.706580E-03 |
| 2.5  | 0.0978   | 0.421521E-03 |

|            |                     |                     |
|------------|---------------------|---------------------|
| <b>3.0</b> | <b>0.0977</b>       | <b>0.262797E-03</b> |
| <b>3.5</b> | <b>0.0404</b>       | <b>0.178541E-03</b> |
| <b>4.0</b> | <b>0.0033</b>       | <b>0.128895E-03</b> |
| <b>4.5</b> | <b>0.0011</b>       | <b>0.946765E-04</b> |
| <b>5</b>   | <b>0.555328E-16</b> | <b>0.692182E-04</b> |

**Table S6.** List of AC magnetic susceptibility measurement parameters of the reported discrete dinuclear Cu(II)–Ln(III) complexes

| Complex <sup>a</sup>                                                                                                                                       | Energy barrier | $\tau_0$ (s)            | Ref       | Entry |
|------------------------------------------------------------------------------------------------------------------------------------------------------------|----------------|-------------------------|-----------|-------|
| [CuL <sup>A</sup> Dy(NO <sub>3</sub> ) <sub>3</sub> ]                                                                                                      | 53K            | 6(5)×10 <sup>-9</sup>   | 54        | 1     |
| [Cu <sub>4</sub> Dy <sub>2</sub> (OH) <sub>2</sub> (NO <sub>3</sub> ) <sub>8</sub> {(py) <sub>2</sub> CO <sub>2</sub> } <sub>2</sub> (MeCN) <sub>4</sub> ] | 20.1(2) K      | 8.3(1)×10 <sup>-9</sup> | 55        | 2     |
| [Dy <sub>3</sub> Cu <sub>2</sub> -(L <sup>B</sup> ) <sub>4</sub> (MeOH)]ClO <sub>4</sub>                                                                   | 7.7K           | 2.6×10 <sup>-5</sup>    | 56        | 3     |
| [Dy <sub>2</sub> Cu <sub>4</sub> (L <sup>B</sup> ) <sub>4</sub> ](ClO <sub>4</sub> ) <sub>2</sub>                                                          | 10.65K         | 2.5×10 <sup>-7</sup>    | 56        | 4     |
| [CuL <sup>C</sup> Dy(NO <sub>3</sub> ) <sub>3</sub> ]                                                                                                      | 15.72K         | 1.70×10 <sup>-7</sup>   | 57        | 5     |
| [CuL <sup>D</sup> Dy(H <sub>2</sub> O)(NO <sub>3</sub> ) <sub>3</sub> ]                                                                                    | 122(1)K        | 9.9(1)×10 <sup>-7</sup> | 58        | 6     |
| [Na <sub>2</sub> Yb{Cu <sub>4</sub> (butyrat) <sub>4</sub> } <sub>2</sub> ]                                                                                | 6.84K          | 1.04×10 <sup>-5</sup>   | This work | 8     |

H<sub>2</sub>L<sup>A</sup>: (H<sub>2</sub>L = N- $\alpha$ -methylsalicylidene-N'-3-methoxysalicylidene-1,3-propanediamine).

H<sub>4</sub>L<sup>B</sup>: 2,2'-(2-hydroxy-3-[(2-hydroxyphenylimino)methyl]-5-methylbenzylazanediyl)diethanol.

H<sub>2</sub>L<sup>C</sup>: (R,R)-N,N'-bis(3-methoxysalicylidene)cyclohexane-1,2-diamine

H<sub>2</sub>L<sup>D</sup>: 1,3-bis(3-ethoxysalicylideneamino)-2-hydroxypropane
